# Supplementary material for: Ovary Dissection Is a Sensitive Measure of Sterility in Anopheles gambiae Exposed to the Insect Growth Regulator Pyriproxyfen
Source: MDPI journal article supplement (doi:10.3390/insects14060552), 2023-06-14
Supplement: s1 [file s1]

**Table S1.** Sterile and fecund *An. gambiae* RSP females by method and treatment group with the sensitivity, specificity, positive predictive value (PPV), and negative predictive value (NPV).

|                        | Oviposition |            |             | Dissection |           |             |
|------------------------|-------------|------------|-------------|------------|-----------|-------------|
|                        | PPF         | Untreated  | N total (%) | PPF        | Untreated | N total (%) |
| <b>N sterile (%)</b>   | 113 (40.6)  | 133 (47.8) | 246 (88.5)  | 54 (40.3)  | 38 (28.4) | 92 (68.7)   |
| <b>N fecund (%)</b>    | 1 (0.4)     | 31 (11.2)  | 32 (11.5)   | 0 (0.0)    | 42 (31.3) | 42 (31.3)   |
| <b>N total (%)</b>     | 114 (41.0)  | 164 (59.0) | 278 (100.0) | 54 (40.3)  | 80 (59.7) | 134 (100.0) |
| <b>Sensitivity (%)</b> | 99.1        |            |             | 100.0      |           |             |
| <b>Specificity (%)</b> | 18.9        |            |             | 52.5       |           |             |
| <b>PPV (%)</b>         | 45.9        |            |             | 58.7       |           |             |
| <b>NPV (%)</b>         | 96.9        |            |             | 100.0      |           |             |

**Table S2.** Prediction of PPF exposure to *An. gambiae* females during blinded dissections.

| Prediction                              | Cylinder Assays |      |               |                      | Tunnel Tests |      |            |               |                      |
|-----------------------------------------|-----------------|------|---------------|----------------------|--------------|------|------------|---------------|----------------------|
|                                         | Untreated       | PPF  | Olyset<br>Net | Olyset<br>Duo<br>20W | Untreated    | PPF  | PPF<br>20W | Olyset<br>Net | Olyset<br>Duo<br>20W |
| N true prediction                       | 105             | 100  | 117           | 14                   | 68           | 82   | 23         | 23            | 23                   |
| N false prediction                      | 7               | 3    | 8             | 60                   | 6            | 9    | 0          | 1             | 0                    |
| N with mixed<br>eggs (no<br>prediction) | 3               | 2    | 2             | 10                   | 1            | 3    | 0          | 0             | 4                    |
| Unpredicted (%)                         | 2.6             | 1.9  | 1.6           | 11.9                 | 1.3          | 3.2  | 0.0        | 0.0           | 14.8                 |
| <b>Correct<br/>prediction (%)</b>       | 93.8            | 97.1 | 93.6          | 18.9                 | 91.9         | 90.1 | 100.0      | 95.8          | 100.0                |

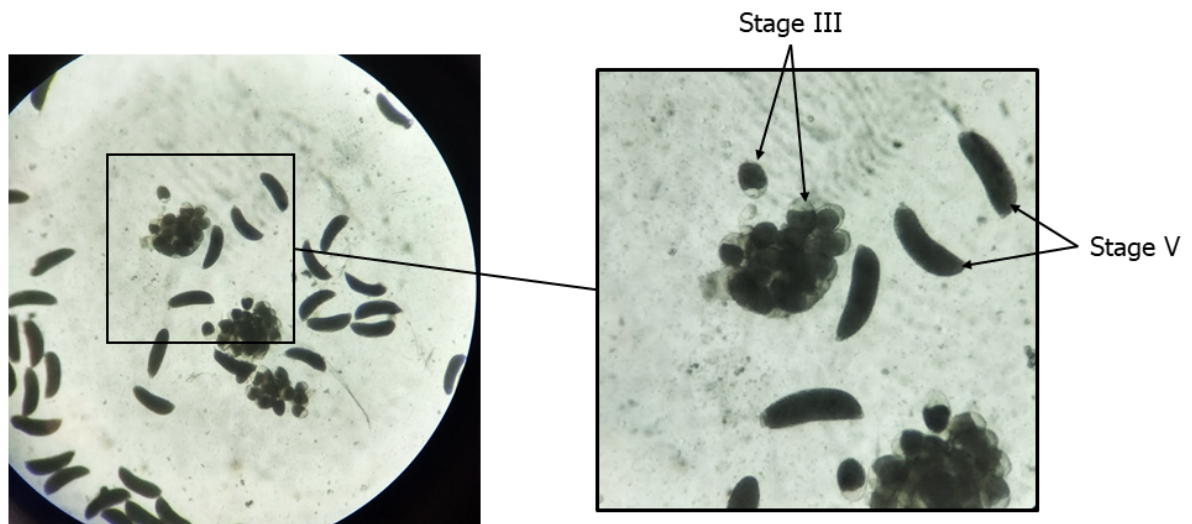

**Figure S1.** Image taken from stereoscopic microscope comparing dissected eggs at Christophers' stage III (underdeveloped) and stage V (developed).
